# Supplementary material for: Characterization and Effect of Refining on the Oil Extracted from Durum Wheat By-Products
Source: MDPI journal article supplement (doi:10.3390/foods11050683), 2022-02-25
Supplement: s1 [file s1]

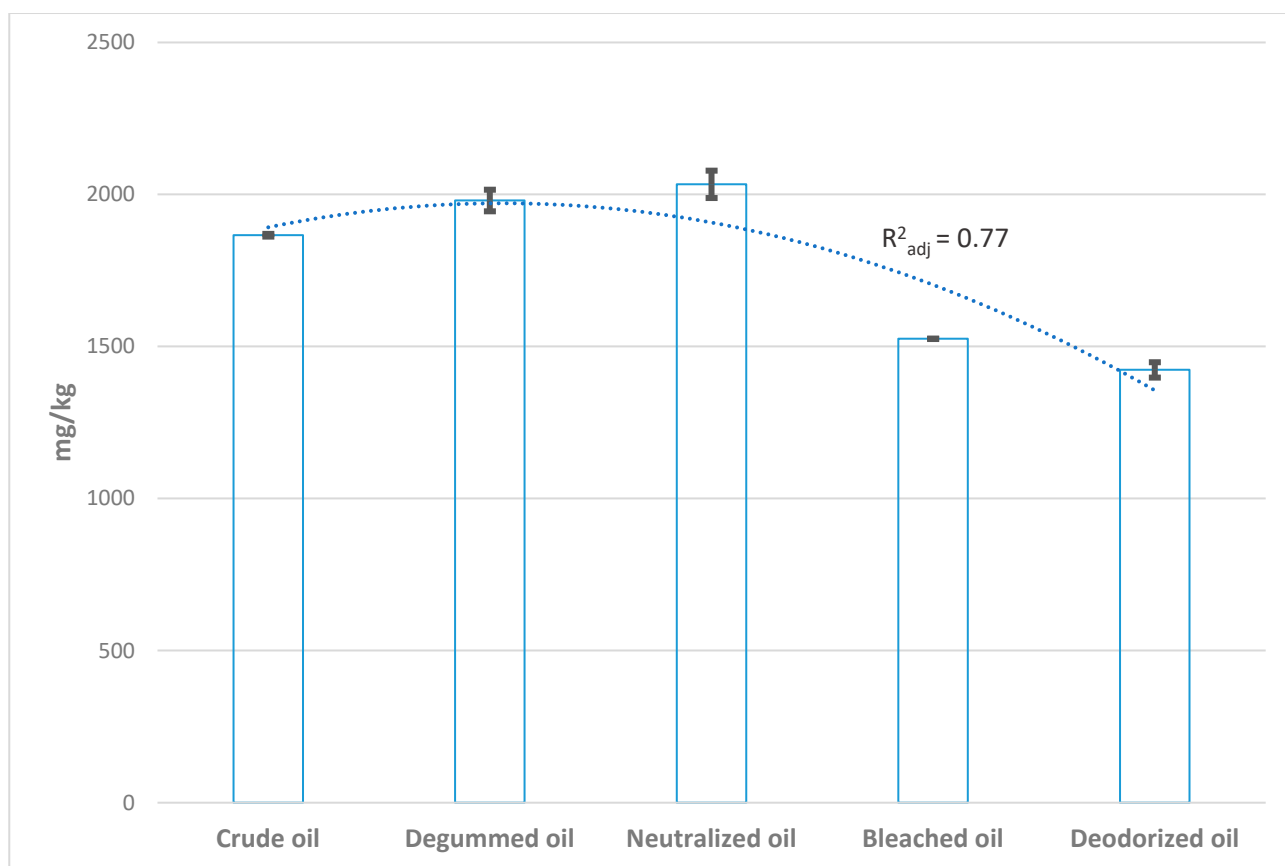

Figure S1. Second order polynomial fitting to the evolution of total vitamin E content during refining. The error bars represent the standard deviation ( $n = 2$ ).
